# Supplementary material for: Limiting opportunities for cheating stabilizes virulence in insect parasitic nematodes
Source: PubMed Central journal article supplement (PMC4778107; doi:10.1111/eva.12348), 2016-01-27

**Figure S1.** Change in infectivity over passage experiment, infectivity being proportion of insects successfully invaded at high rate (500 IJs per dish).

Data are treatment means +SE based on normal approximation to the binomial. Open bar at P0 indicates the baseline.  $N = 60$  for baseline, and  $N = 80$  for all other experiments.

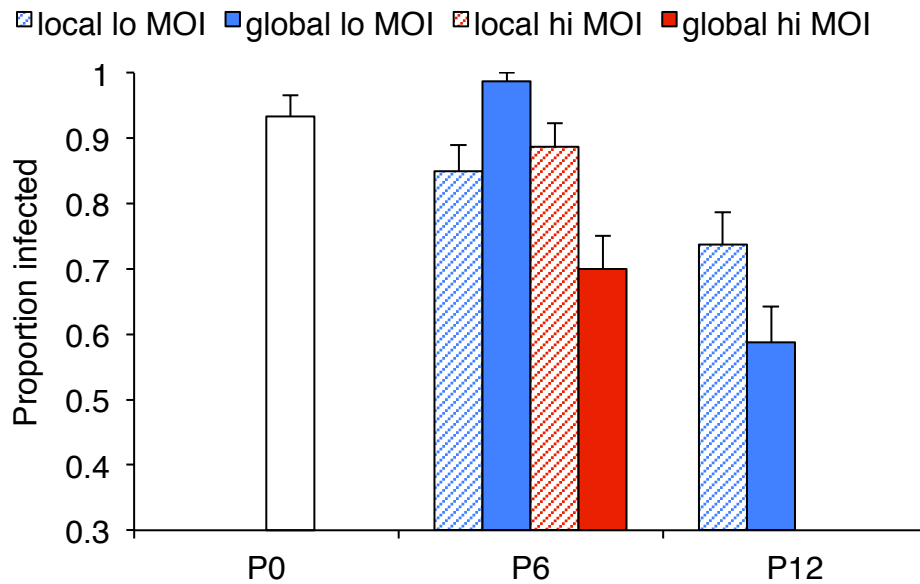

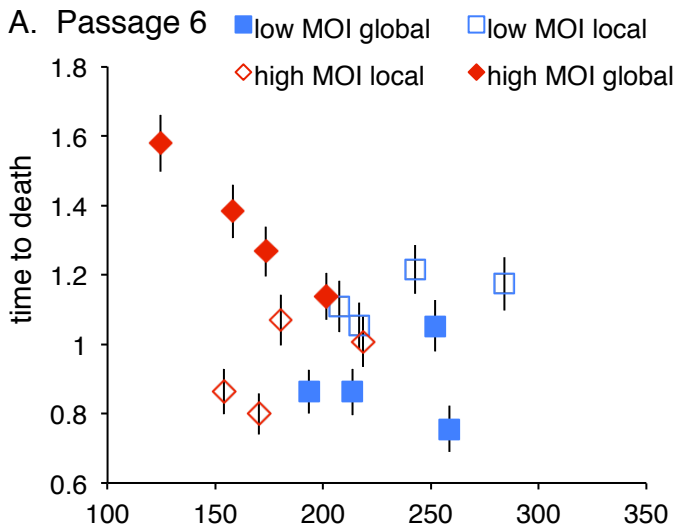

**Figure S2.** The relationship between virulence (time to death $\pm$ SE) and nematode reproduction within and between assays at passage 6 and 12. **A.** At passage 6 there was no significant correlation between time to death (as estimated by survivorship models) and nematodes ( $P = 0.2$ ) **B.** nor were there obvious correlations between these variables at passage 12.

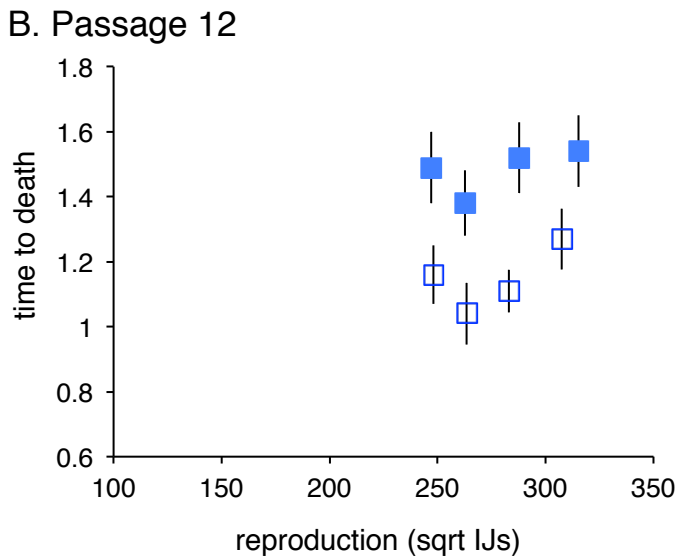

Supplement: EVA-9-462-s001.pdf [file EVA-9-462-s001.pdf]
